# Supplementary material for: Paeonia peregrina Mill Petals as a New Source of Biologically Active Compounds: Chemical Characterization and Skin Regeneration Effects of the Extracts
Source: MDPI journal article supplement (doi:10.3390/ijms241411764), 2023-07-21
Supplement: s1 [file s1]

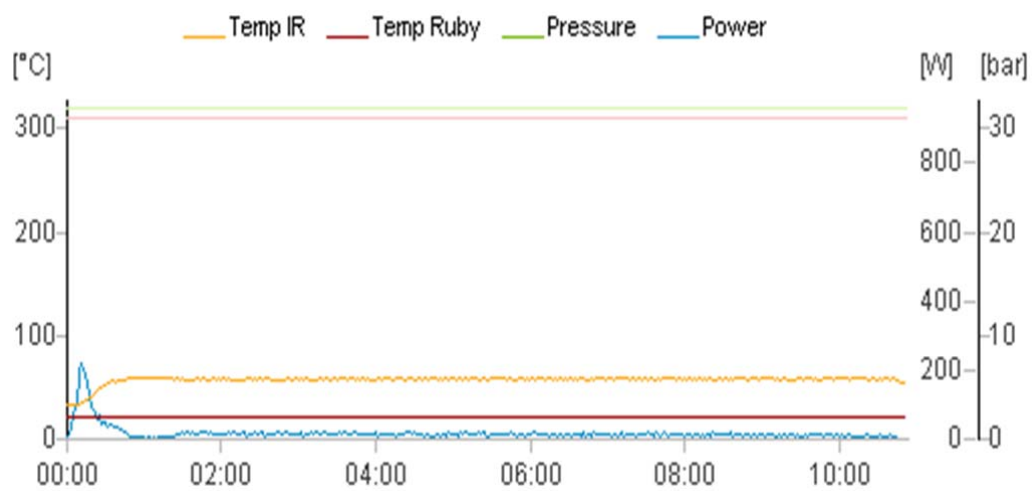

**Supplementary Figure S1** Energy input (blue line – power [W]), pressure (green line – in bars) and temperature (yellow line – temp IR [°C])
