# Supplementary material for: Paeonia peregrina Mill Petals as a New Source of Biologically Active Compounds: Chemical Characterization and Skin Regeneration Effects of the Extracts
Source: MDPI journal article supplement (doi:10.3390/ijms241411764), 2023-07-21
Supplement: s1 [file s1]

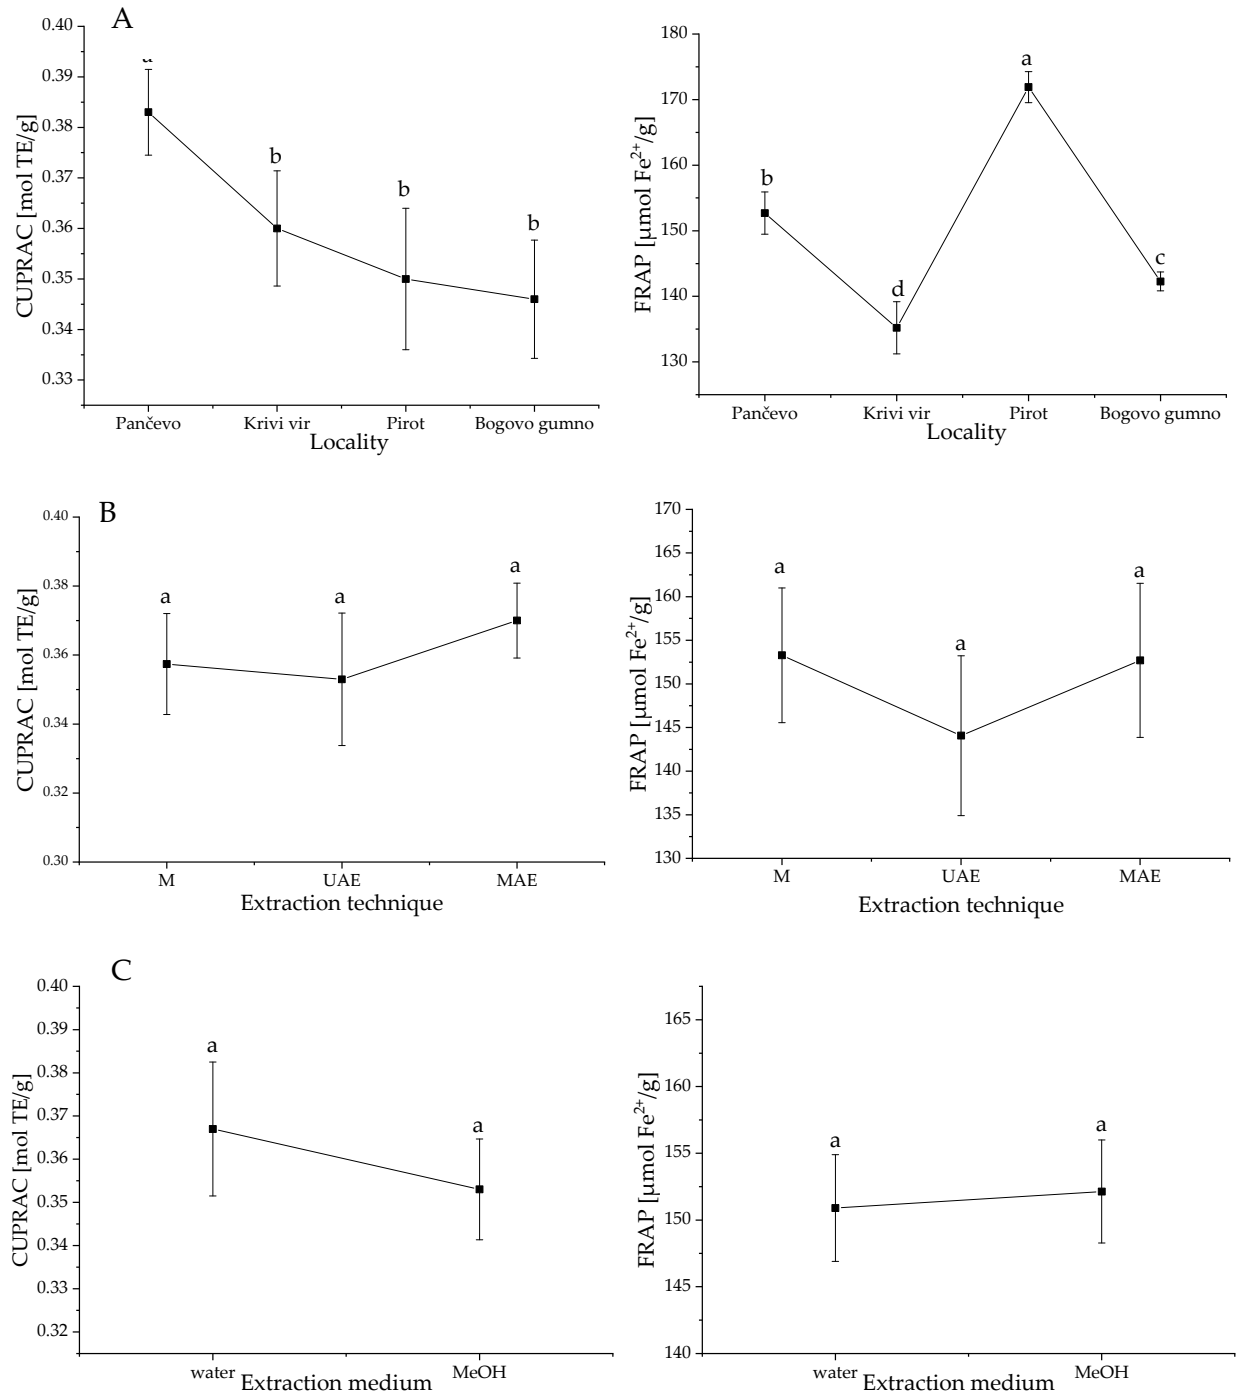

**Supplementary Figure S5.** Cupric ion reducing antioxidant capacity (CUPRAC) and ferric reducing antioxidant power (FRAP) of the extracts of *Paeonia peregrina* Mill. petals; the influence of A) localities (Pančevo, Krivi vir, Pirot, and Bogovo gumno), B) extraction techniques (maceration, M, ultrasound--assisted extraction, UAE, and microwave-assisted extraction MAE), and C) extraction mediums (water and methanol, MeOH); values with the same letter showed no statistically significant difference ( $p > 0.05$ ;  $n = 3$ , one-way ANOVA, analysis of variance, Duncan's *post-hoc* test).
