# Supplementary material for: Paeonia peregrina Mill Petals as a New Source of Biologically Active Compounds: Chemical Characterization and Skin Regeneration Effects of the Extracts
Source: MDPI journal article supplement (doi:10.3390/ijms241411764), 2023-07-21
Supplement: s1 [file s1]

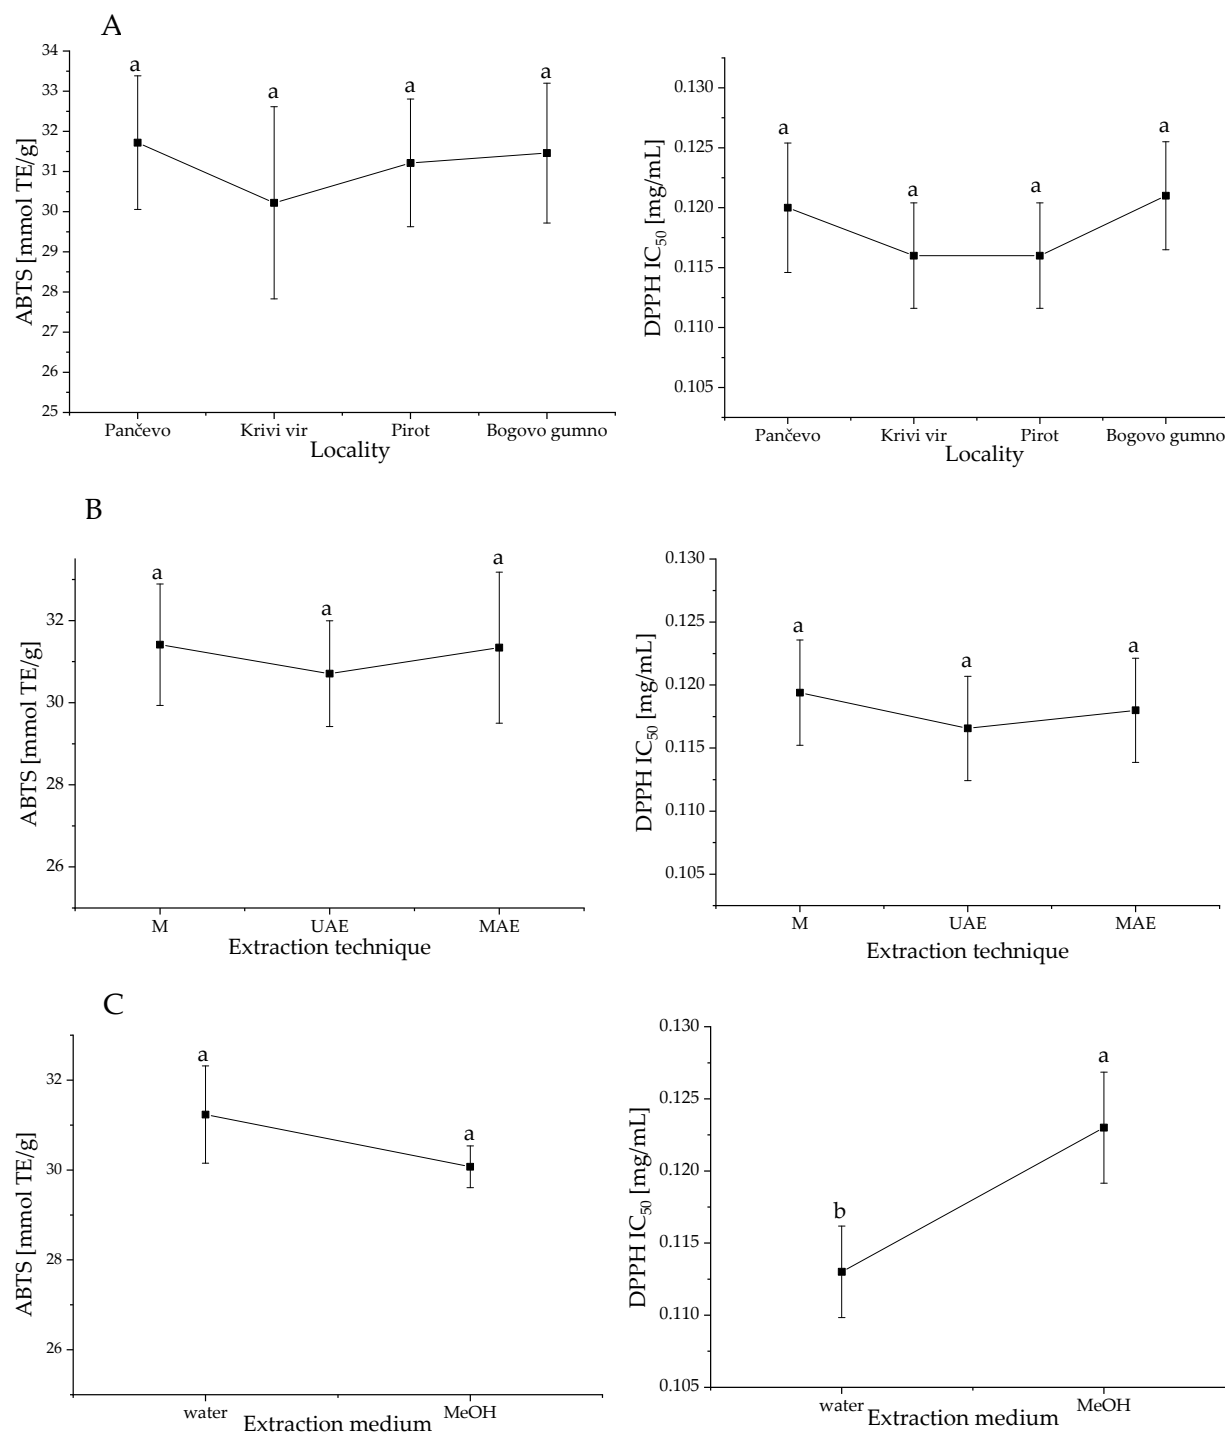

**Supplementary Figure S4.** ABTS and DPPH radical scavenging potential of the extracts of *Paeonia peregrina* Mill. petals; the influence of (A) localities (Pančevo, Krivi vir, Pirot, and Bogovo gumno), (B) extraction techniques (maceration, M, ultrasound-assisted extraction, UAE, and microwave-assisted extraction, MAE), and (C) extraction mediums (water and methanol, MeOH); values with the same letter showed no statistically significant difference ( $p > 0.05$ ;  $n=3$ , one-way ANOVA, analysis of variance, Duncan's *post-hoc* test); IC<sub>50</sub>, the concentration of the extract required to scavenge 50% of free DPPH radicals.
