# Supplementary material for: Paeonia peregrina Mill Petals as a New Source of Biologically Active Compounds: Chemical Characterization and Skin Regeneration Effects of the Extracts
Source: MDPI journal article supplement (doi:10.3390/ijms241411764), 2023-07-21
Supplement: s1 [file s1]

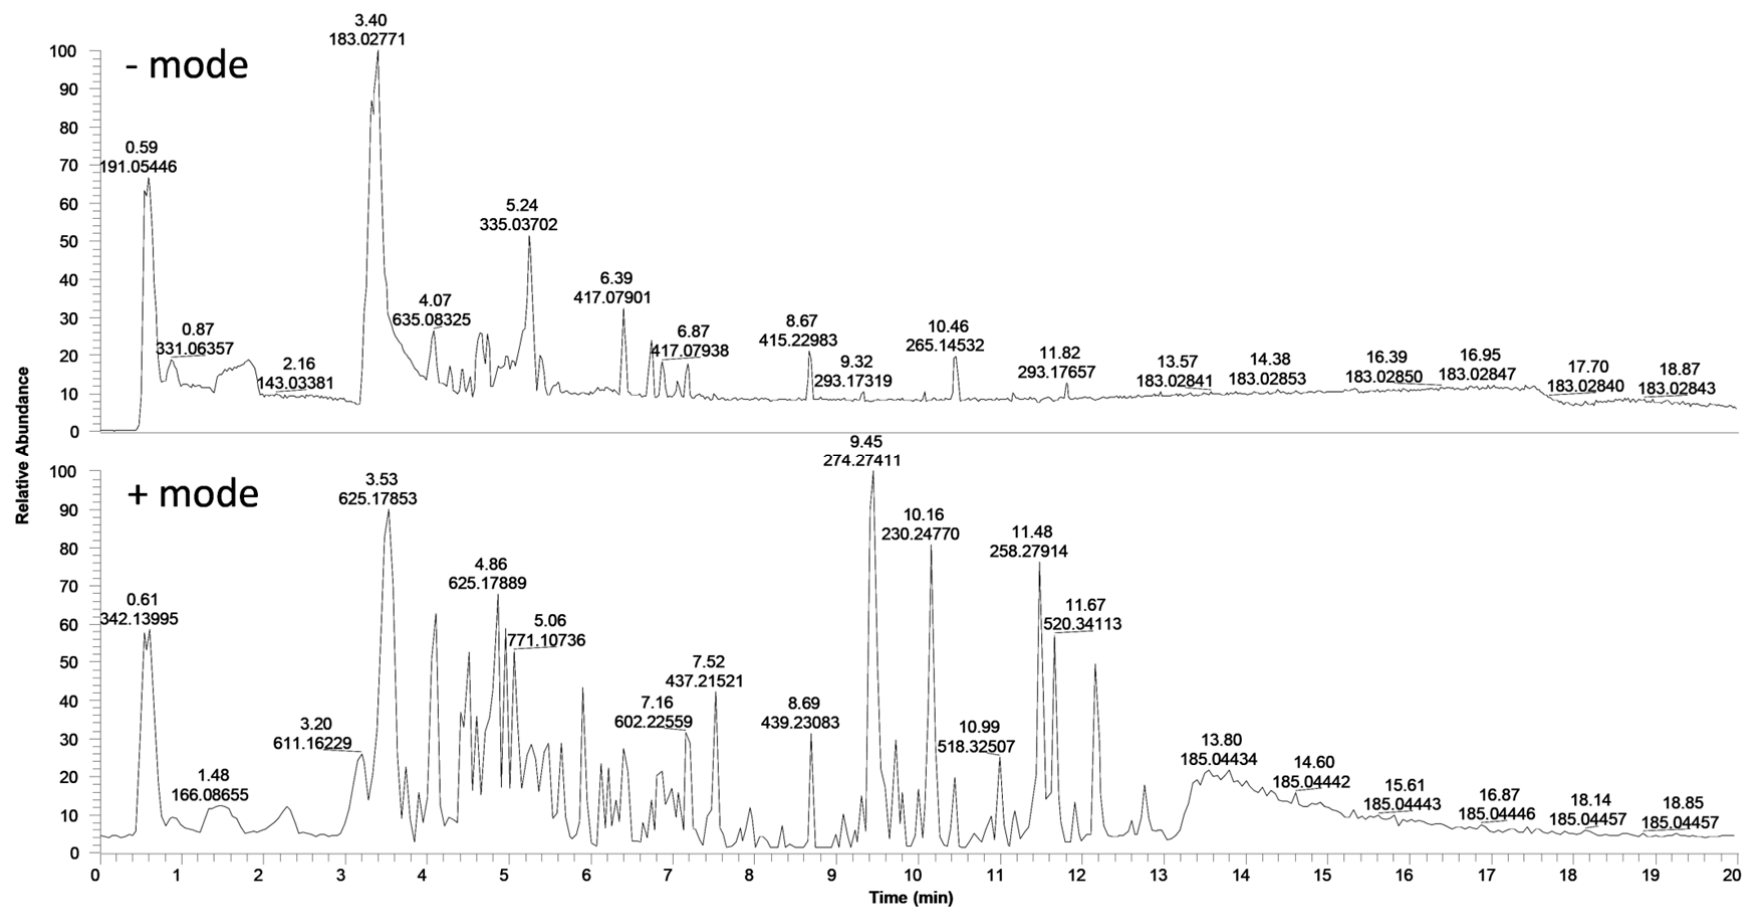

Supplementary Figure S3. Base peak chromatograms of *P. peregrina* in negative (top) and positive (bottom) ionization modes.
